# Supplementary material
Source: PubMed Central journal article supplement (PMC10372982)
Supplement: jmcp.2022.28.2.196_S001.pdf [file jmcp.2022.28.2.196_S001.pdf]

## **SUPPLEMENTARY MATERIALS**

### **Social determinants of health and adult influenza vaccination: a nationwide claims analysis**

Justin Gatwood, PhD, MPH; Sujith Ramachandran, PhD; Sohul A Shuvo, MS; Michael Behal, PharmD; Tracy Hagemann, PharmD; Kenneth C Hohmeier, PharmD; and Chi-Yang Chiu, PhD

**Supplementary Table 1. Codes to Determine Influenza Vaccine Uptake**

**Supplementary Table 2. Diagnosis Codes to Determine Immunocompetency Status**

**Supplementary Table 1. Codes to Determine Influenza Vaccine Uptake**

| Type of code                                                                              | Codes                                                                                                                                                                                                                                                                                                                                                                                                                                                                                                                                                                                                                                                                                                                                                                                                                                                                                                                                                                                                                                                                                                                                                                                                                                                                                                                                                                                                                                                                                                                                                                                                                                                                                                                                                                                                                                                                                                                                                                                                                                                  |
|-------------------------------------------------------------------------------------------|--------------------------------------------------------------------------------------------------------------------------------------------------------------------------------------------------------------------------------------------------------------------------------------------------------------------------------------------------------------------------------------------------------------------------------------------------------------------------------------------------------------------------------------------------------------------------------------------------------------------------------------------------------------------------------------------------------------------------------------------------------------------------------------------------------------------------------------------------------------------------------------------------------------------------------------------------------------------------------------------------------------------------------------------------------------------------------------------------------------------------------------------------------------------------------------------------------------------------------------------------------------------------------------------------------------------------------------------------------------------------------------------------------------------------------------------------------------------------------------------------------------------------------------------------------------------------------------------------------------------------------------------------------------------------------------------------------------------------------------------------------------------------------------------------------------------------------------------------------------------------------------------------------------------------------------------------------------------------------------------------------------------------------------------------------|
| National Drug Code                                                                        | 66019011010, 66019010701, 66019010810, 66019010910, 66019020010, 49281065050, 33332051925, 66521020010, 33332051901, 49281065070, 49281065090, 49281065010, 49281065025, 33332062910, 66521020002, 49281064015, 49281038965, 49281039165, 49281039765, 49281039565, 49281039965, 49281038765, 49281039365, 49281040165, 49281001450, 49281011325, 49281001110, 49281001150, 49281011125, 49281001350, 70461012002, 66521011502, 58160088052, 58160087952, 33332001401, 49281001010, 33332001301, 49281001025, 49281001310, 49281001250, 49281001210, 49281011225, 49281001050, 66521011402, 33332001001, 19515085052, 58160088352, 70461011912, 33332001501, 66521011302, 66521011602, 33332001601, 58160088352, 33332001701, 66521011802, 66521011202, 58160088152, 66521011702, 66521011210, 33332011310, 33332011610, 66521011310, 33332011410, 66521011710, 49281038815, 19515089307, 66521011610, 49281039215, 19515089307, 33332011510, 49281038615, 70461011911, 19515088907, 19515089007, 66521011810, 49281039615, 33332011710, 70461012010, 19515084511, 33332011010, 66521011410, 49281039415, 49281039015, 66521011510, 49281070955, 49281070755, 49281070555, 49281070355, 66019030301, 66019030410, 66019030010, 66019030210, 66019030110, 49281041610, 19515090152, 49281041410, 58160090152, 58160090752, 49281041510, 33332031601, 19515090852, 33332031701, 19515089452, 19515091252, 49281041650, 58160090352, 49281041310, 58160090052, 49281041350, 49281041450, 49281041750, 49281041710, 58160090552, 62577061401, 62577061301, 63851061301, 63851061201, 62577061301, 70461061401, 42874001510, 42874001610, 42874001310, 42874001710, 42874001210, 42874001410, 49281062715, 33332041610, 19515089511, 49281062115, 33332041710, 19515089611, 19515090311, 19515089811, 49281062515, 19515089111, 58160080815, 58160080815, 49281051725, 49281051425, 49281051325, 49281051625, 49281071040, 49281071240, 70461000101, 66521000001, 70461000201, 70461020101, 70461020001, 42874011610, 42874011710, 70461020002, 70461030110 |
| Current Procedural Terminology (CPT®) / Healthcare Common Procedure Coding System (HCPCS) | 90630, 90674, 90682, 90685, 90686, 90687, 90688, 90756, 90656, 90658, 90673, Q2034, Q2035, Q2036, Q2037, Q2038, Q2039                                                                                                                                                                                                                                                                                                                                                                                                                                                                                                                                                                                                                                                                                                                                                                                                                                                                                                                                                                                                                                                                                                                                                                                                                                                                                                                                                                                                                                                                                                                                                                                                                                                                                                                                                                                                                                                                                                                                  |

**Supplementary Table 2. Diagnosis Codes to Determine Immunocompetency Status**

| Category                                          | Description                                                                                                                                                                           | ICD9         | ICD10                                                           |
|---------------------------------------------------|---------------------------------------------------------------------------------------------------------------------------------------------------------------------------------------|--------------|-----------------------------------------------------------------|
| Hematologic malignancy                            | Lymphomas                                                                                                                                                                             | 200.xx       | C83.xx                                                          |
|                                                   | Hodgkin's Disease                                                                                                                                                                     | 201.x        | C81.xx                                                          |
|                                                   | Lymphomas                                                                                                                                                                             | 202.x        | C82.xx, C84.xx, C96.xx, C91.xx, C85.xx, C86.xx                  |
|                                                   | Multiple myeloma                                                                                                                                                                      | 203.x        | C88.xx, C90.xx                                                  |
|                                                   | Leukemia                                                                                                                                                                              | 204.x-208.x  | C91.xx, C92.xx, C93.xx, C94.xx, C95.xx, D45                     |
|                                                   | Malignant carcinoid tumors of small intestine, appendix, large intestine, rectum, other sites; malignant poorly differentiated neuroendocrine tumors; secondary neuroendocrine tumors | 209.x        | C4A.xx, C7A.xx, C7B.xx, D3A.xx                                  |
|                                                   | Polycythemia vera, histiocytic and mast cells, plasma cells, other lymphatic and hemotopoietic tissues                                                                                | 238.4x-238.7 | D45, D46, D47                                                   |
| Solid tumor malignancy                            | Malignant neoplasms                                                                                                                                                                   | 140.x-175.x  | C00-C26, C30-C34, C37-C41, C43-C58, C60-C75, C76-C90            |
|                                                   | Secondary and unspecified malignancies                                                                                                                                                | 196.x-199.x  | C77, C78, C79, C80, C45                                         |
|                                                   | Neoplasms of uncertain behavior                                                                                                                                                       | 235.x-239.x  | C88, C94, D37, D38, D39, D40, D41, D42, D43, D44, D48, D49, Q85 |
|                                                   | Malignant pleural effusion                                                                                                                                                            | 511.81       | J91.0                                                           |
|                                                   | Poisoning by antineoplastic antibiotics                                                                                                                                               | 960.7        | T45.1x1                                                         |
|                                                   | Poisoning by antineoplastic/immunosuppressive agent                                                                                                                                   | 963.1        | T45.1x2, T45.1x3, T45.1x4                                       |
|                                                   | Extravasation of vesicant chemotherapy                                                                                                                                                | 999.81       | T80.810                                                         |
|                                                   | Encounter for antineoplastic chemotherapy and immunotherapy                                                                                                                           | V58.1x       | Z51.1x                                                          |
|                                                   | Convalescence and palliative care following chemotherapy                                                                                                                              | V66.2        | Z51.89                                                          |
|                                                   | Cancer chemotherapy follow-up                                                                                                                                                         | V67.2        | Z08, Z09                                                        |
|                                                   | Adverse effect – antineoplastic antibiotics                                                                                                                                           | E930.7       | T45.1x5                                                         |
| Adverse effect – antineoplastic/immunosuppressive | E933.1                                                                                                                                                                                | T45.1x5      |                                                                 |
| Human immunodeficiency virus (HIV)                | Human Immunodeficiency Virus Infection                                                                                                                                                | 042          | B20                                                             |
|                                                   | Asymptomatic human immunodeficiency virus infection                                                                                                                                   | V08          | Z21                                                             |

|                       |                                                                                                                |        |                                                                                                                    |
|-----------------------|----------------------------------------------------------------------------------------------------------------|--------|--------------------------------------------------------------------------------------------------------------------|
|                       | Human Immunodeficiency Virus, type 2                                                                           | 079.53 | B97.35                                                                                                             |
| Chronic renal failure | Anemia in chronic renal disease                                                                                | 285.21 | D63.1                                                                                                              |
|                       | Hypertensive chronic kidney disease malignant or benign or unspecified, with kidney disease stage V or ESRD    | 403.01 | I12.0                                                                                                              |
|                       | Hypertensive chronic kidney disease malignant or benign or unspecified, with kidney disease stage V or ESRD    | 403.11 | I12.0                                                                                                              |
|                       | Hypertensive chronic kidney disease malignant or benign or unspecified, with kidney disease stage V or ESRD    | 403.91 | I12.0                                                                                                              |
|                       | Hypertensive heart and kidney disease, malignant or benign or unspecified, with kidney disease stage V or ESRD | 404.02 | I13.11                                                                                                             |
|                       | Hypertensive heart and kidney disease, malignant or benign or unspecified, with kidney disease stage V or ESRD | 404.03 | I13.2                                                                                                              |
|                       | Hypertensive heart and kidney disease, malignant or benign or unspecified, with kidney disease stage V or ESRD | 404.12 | I13.11                                                                                                             |
|                       | Hypertensive heart and kidney disease, malignant or benign or unspecified, with kidney disease stage V or ESRD | 404.13 | I13.2                                                                                                              |
|                       | Hypertensive heart and kidney disease, malignant or benign or unspecified, with kidney disease stage V or ESRD | 404.92 | I13.11                                                                                                             |
|                       | Hypertensive heart and kidney disease, malignant or benign or unspecified, with kidney disease stage V or ESRD | 404.93 | I13.2                                                                                                              |
|                       | Hypotension of hemodialysis                                                                                    | 458.21 | I95.3                                                                                                              |
|                       | Chronic glomerulonephritis, Nephritis and nephropathy, not specified as acute or chronic                       | 582.x  | N03.x, N08                                                                                                         |
|                       | Chronic glomerulonephritis, Nephritis and nephropathy, not specified as acute or chronic                       | 583.x  | E09.21, E09.22, E09.29, M32.14, M32.15, M35.04, N05.x, N06.x, N07.x, N14.x, N15.0, N15.8, N15.9, N16, N17.1, N17.2 |
|                       | Chronic kidney disease, stage V                                                                                | 585.5  | N18.5                                                                                                              |
|                       | Chronic kidney disease, ESRD                                                                                   | 585.6  | N18.6                                                                                                              |
|                       | Renal failure, unspecified                                                                                     | 586    | N19                                                                                                                |
| Renal osteodystrophy  | 588.0                                                                                                          | N25.0  |                                                                                                                    |

|  |                                                                                 |               |                                                                                                                                                                                                                                                                                                                                                                                                                                                                                                                     |
|--|---------------------------------------------------------------------------------|---------------|---------------------------------------------------------------------------------------------------------------------------------------------------------------------------------------------------------------------------------------------------------------------------------------------------------------------------------------------------------------------------------------------------------------------------------------------------------------------------------------------------------------------|
|  | Other specified or unspecified disorders resulting from impaired renal function | 588.8x        | N25.81, N25.89                                                                                                                                                                                                                                                                                                                                                                                                                                                                                                      |
|  | Other specified or unspecified disorders resulting from impaired renal function | 588.9         | N25.9                                                                                                                                                                                                                                                                                                                                                                                                                                                                                                               |
|  | Vesicoureteral reflux with reflux nephropathy, bilateral or NOS                 | 593.71-593.73 | N13.721, N13.722, N13.731, N13.732                                                                                                                                                                                                                                                                                                                                                                                                                                                                                  |
|  | Cloudy hemodialysis (peritoneal) dialysis effluent                              | 792.5         | R88.0                                                                                                                                                                                                                                                                                                                                                                                                                                                                                                               |
|  | Mechanical complication due to peritoneal dialysis catheter                     | 996.56        | T85.611x, T85.621x, T85.631x, T85.691x                                                                                                                                                                                                                                                                                                                                                                                                                                                                              |
|  | Other complications due to renal dialysis device, implant, graft                | 996.73        | T82.818x, T82.828x, T82.838x, T82.848x, T82.858x, T82.868x, T82.898x                                                                                                                                                                                                                                                                                                                                                                                                                                                |
|  | Renal dialysis status                                                           | V45.1x        | Z91.15, Z99.2                                                                                                                                                                                                                                                                                                                                                                                                                                                                                                       |
|  | Encounter for dialysis and dialysis catheter care                               | V56.x         | Z49.x                                                                                                                                                                                                                                                                                                                                                                                                                                                                                                               |
|  | Kidney dialysis (cause of abnormal reaction or later complication)              | E879.1        | Y84.1                                                                                                                                                                                                                                                                                                                                                                                                                                                                                                               |
|  | Venous catheterization for renal dialysis                                       | 38.95         | 05HY03Z, 05HY33Z, 05HY43Z, 06HY03Z, 06HY33Z                                                                                                                                                                                                                                                                                                                                                                                                                                                                         |
|  | Arteriovenostomy for renal dialysis                                             | 39.27         | '03150AV' '03130ZD' '03140ZD' '03150ZD' '03160ZD' '03170ZD' '03180ZD' '03190ZF' '031A0ZF' '031B0ZF' '031C0ZF'                                                                                                                                                                                                                                                                                                                                                                                                       |
|  | Revision of arteriovenous shunt for renal dialysis                              | 39.42         | '031209D' '031209F' '03120AD' '03120AF' '03120JD' '03120JF' '03120KD' '03120KF' '03120ZD' '03120JF' '03120ZF' '031309D' '031309F' '03130AD' '03130AF' '03130JD' '03130JF' '03130KD' '03130KF' '03130ZD' '03130ZF' '031409D' '031409F' '03140AD' '03140AF' '03140JD' '03140JF' '03140KD' '03140KF' '03140ZD' '031509D' '031509F' '03150AD' '03150AF' '03150JD' '03150JF' '03150KD' '03150KF' '03150ZD' '03150ZF' '031609D' '031609F' '03160AD' '03160AF' '03160JD' '03160JF' '03160KD' '03160KF' '03160ZD' '03160ZF' |

|                               |                                                         |               |                                                                                                                                                                                                                                                                                                                                                                                                                                         |
|-------------------------------|---------------------------------------------------------|---------------|-----------------------------------------------------------------------------------------------------------------------------------------------------------------------------------------------------------------------------------------------------------------------------------------------------------------------------------------------------------------------------------------------------------------------------------------|
|                               |                                                         |               | '031709D' '031709F'<br>'03170AD' '03170AF'<br>'03170JD' '03170JF'<br>'03170KD' '03170KF'<br>'03170ZD' '03170ZF'<br>'031809D' '031809F'<br>'03180AD' '03180AF'<br>'03180JD' '03180JF'<br>'03180KD' '03180KF'<br>'03180ZD' '03180ZF'<br>'031909F' '03190AF'<br>'03190JF' '03190KF'<br>'03190ZF' '031A09F'<br>'031A0AF' '031A0JF'<br>'031A0KF' '031A0ZF'<br>'031B0KF' '031B0ZF'<br>'031C09F' '031C0AF'<br>'031C0JF' '031C0KF'<br>'031C0ZF' |
|                               | Hemodialysis                                            | 39.95         | 5A1D00Z' '5A1D60Z'                                                                                                                                                                                                                                                                                                                                                                                                                      |
|                               | Peritoneal dialysis                                     | 54.98         | 3E1M39Z'                                                                                                                                                                                                                                                                                                                                                                                                                                |
| Nephrotic syndrome            | Nephrotic syndrome                                      | 581.x         | N04.x                                                                                                                                                                                                                                                                                                                                                                                                                                   |
| Mycobacteria                  | Diseases due to other mycobacteria                      | 031.x         | A31.x                                                                                                                                                                                                                                                                                                                                                                                                                                   |
| Actinomycotic Infection       | Actinomycotic infection                                 | 039.x         | A42.x                                                                                                                                                                                                                                                                                                                                                                                                                                   |
| Opportunistic mycoses         | Opportunistic mycoses                                   | 118           | B48.8                                                                                                                                                                                                                                                                                                                                                                                                                                   |
| Toxoplasmosis                 | Toxoplasmosis                                           | 130.x         | B58.x                                                                                                                                                                                                                                                                                                                                                                                                                                   |
| Immune mechanism              | Disorders involving the immune mechanism                | 279.x         | D80.x-D89.x                                                                                                                                                                                                                                                                                                                                                                                                                             |
| Aplastic anemia               | Aplastic anemia and other bone marrow failure syndromes | 284.x         | D60.x, D61.x                                                                                                                                                                                                                                                                                                                                                                                                                            |
| Neutropenia                   | Neutropenia                                             | 288.0x        | D70.x                                                                                                                                                                                                                                                                                                                                                                                                                                   |
| Neutrophils                   | Functional disorders of polymorphonuclear neutrophils   | 288.1         | D71                                                                                                                                                                                                                                                                                                                                                                                                                                     |
| Genetic anomaly of leukocytes | Genetic anomalies of leukocytes                         | 288.2         | D72.0                                                                                                                                                                                                                                                                                                                                                                                                                                   |
| Other selected conditions     | Other specified disease of white blood cells            | 288.8         | D72.89                                                                                                                                                                                                                                                                                                                                                                                                                                  |
|                               | Unspecified disease of white blood cells                | 288.9         | D72.9                                                                                                                                                                                                                                                                                                                                                                                                                                   |
| Organ transplant              | Organs replaced by transplant                           | V42.0         | Z48.2x, Z94.x                                                                                                                                                                                                                                                                                                                                                                                                                           |
|                               | Organs replaced by transplant                           | V42.1         | Z48.2x, Z94.x                                                                                                                                                                                                                                                                                                                                                                                                                           |
|                               | Organs replaced by transplant                           | V42.2         | Z48.2x, Z94.x                                                                                                                                                                                                                                                                                                                                                                                                                           |
|                               | Organs replaced by transplant                           | V42.6         | Z48.2x, Z94.x                                                                                                                                                                                                                                                                                                                                                                                                                           |
|                               | Organs replaced by transplant                           | V42.7         | Z48.2x, Z94.x                                                                                                                                                                                                                                                                                                                                                                                                                           |
|                               | Organs replaced by transplant                           | V42.81-V42.84 | Z48.2x, Z94.x                                                                                                                                                                                                                                                                                                                                                                                                                           |
|                               | Organs replaced by transplant                           | V42.89        | Z48.2x, Z94.x                                                                                                                                                                                                                                                                                                                                                                                                                           |
|                               | Organs replaced by transplant                           | V42.9         | Z48.2x, Z94.x                                                                                                                                                                                                                                                                                                                                                                                                                           |

|                                                                                          |        |                                                                        |
|------------------------------------------------------------------------------------------|--------|------------------------------------------------------------------------|
| Complication of transplantation                                                          | 996.8x | T86.x                                                                  |
| Lung transplant                                                                          | 33.5x  | 0BYXXXX                                                                |
| Combined heart-lung transplant                                                           | 33.6   | 02YA0Z0' '02YA0Z1'<br>'02YA0Z2'<br>'0BYM0Z0'<br>'0BYM0Z1'<br>'0BYM0Z2' |
| Heart transplant                                                                         | 37.5x  | 02YA0Z0' '02YA0Z1'<br>'02YA0Z2'                                        |
| Bone marrow or hematopoietic stem cell transplant                                        | 41.0x  | 302XXXX                                                                |
| Transplant of spleen                                                                     | 47.94  | 07YPXXX                                                                |
| Transplant of intestine                                                                  | 46.97  | 0DYEXXX,<br>0DY8XXX                                                    |
| Liver transplant                                                                         | 50.5x  | 0FY0XXX                                                                |
| Transplant of pancreas                                                                   | 52.80  | 0FYGXXX                                                                |
| Transplant of pancreas                                                                   | 52.82  | 0FYGXXX                                                                |
| Transplant of pancreas                                                                   | 52.83  | 0FYGXXX                                                                |
| Allotransplantation of cells of islets of Langerhans (pancreas, not otherwise specified) | 52.85  | 3E030U1' '3E033U1'<br>'3E0J3U1' '3E0J7U1'<br>'3E0J8U1'                 |
| Allotransplantation of cells of islets of Langerhans (pancreas, not otherwise specified) | 52.86  | 3E030U0' '3E033U0'<br>'3E0J3U0' '3E0J7U0'<br>'3E0J8U0'                 |
| Kidney transplant                                                                        | 55.69  | 0TY1XXX,<br>0TY0XXX                                                    |
